# **Commissural neurons transgress the CNS/PNS boundary in absence of ventricular zone-derived netrin-1**

Juan Antonio Moreno-Bravo<sup>1,†</sup>, Sergi Roig Puiggros<sup>1,†</sup>, Heike Blockus<sup>1</sup>, Chloé Dominici<sup>1</sup>, Pavol Zelina<sup>1</sup>, Patrick Mehlen<sup>2</sup> and Alain Chédotal<sup>1\*</sup>

<sup>1</sup> Sorbonne Universités, UPMC Univ Paris 06, INSERM, CNRS, Institut de la Vision, 17 Rue Moreau, 75012 Paris, France.

<sup>2</sup> Apoptosis, Cancer and Development Laboratory, Equipe labellisée 'La Ligue', LabEx DEVweCAN, Centre de Recherche en Cancérologie de Lyon, INSERM U1052-CNRS UMR5286, Université de Lyon, Centre Léon Bérard, 69008 Lyon, France

† These authors contributed equally

\*corresponding author: alain.chedotal@inserm.fr ,

Keywords: netrin, Dcc, pontine neurons, cerebellum, migration, commissural neurons

## Abstract

During the development of the central nervous system (CNS), only motor axons project into peripheral nerves. Little is known about the cellular and molecular mechanisms, which control the development of a boundary at the CNS surface and prevent CNS neurons emigration from the neural tube. It was previously shown that a subset of spinal cord commissural axons abnormally invades sensory nerves in *Ntn1* hypomorphic embryos and *Dcc* knockouts. However, whether netrin-1 also plays a similar role in the brain is unknown. In the hindbrain, precerebellar neurons migrate tangentially under the pial surface and their ventral migration is guided by netrin-1. Here, we show that pontine neurons and inferior olivary neurons, two types of precerebellar neurons, are not confined to the CNS in *Ntn1* and *Dcc* mutant mice, but that they invade the trigeminal, auditory and vagus nerves. Using a *Ntn1* conditional knockout, we show that netrin-1, released at the pial surface by ventricular zone progenitors is responsible for the CNS confinement of precerebellar neurons. We propose, that netrin-1 distribution sculpts the CNS boundary by keeping CNS neurons in netrin-1 rich-domains.

## Introduction

Netrin-1 is a secreted protein controlling cell-cell interactions in many organs and species, during development and in pathological conditions (Mehlen et al., 2011). In the central nervous system (CNS), netrin-1 promotes axon outgrowth to the midline, axon attachment to their targets and neuronal migration (Akin and Zipursky, 2016; Serafini et al., 1994; Serafini et al., 1996; Yee et al., 1999). Netrin-1 is secreted, but acts locally by promoting cell adhesion and haptotaxis (Akin and Zipursky, 2016; Li et al., 2004; Moore et al., 2009). In the mouse hindbrain and spinal cord, netrin-1 is not only produced by floor plate, but is also released at the pial surface by neural precursors of the ventricular zone (Dominici et al., 2017; Kennedy et al., 1994; Varadarajan et al., 2017). This suggests that netrin-1 accumulation in the basal lamina provides a permissive substrate for axon extension. In the spinal cord, netrin-1 and its receptor deleted in colorectal cancer (Dcc) influence the confinement of commissural axons to the CNS (Laumonnerie et al., 2014). In the spinal cord, two repulsive guidance cues, Netrin5 and Sema6A, also act as gate keepers at the CNS/PNS border (Bron et al., 2007; Garrett et al., 2016; Mauti et al., 2007). Both cues are expressed by so-called boundary cap (BC) cells which constrain motor neuron and oligodendrocyte soma to the spinal cord and prevent them from migrating along motor nerves into the PNS (Kucenas et al., 2009; Vermeren et al., 2003). Whether such mechanisms are at play at the level of the hindbrain is unknown.

Interestingly, several classes of hindbrain neurons, preferentially migrate tangentially under the pial surface in a netrin-1-rich domain (Stanco and Anton, 2013). This is the case of the pontine nucleus, one of the four hindbrain precerebellar nuclei, which contain neurons projecting to the cerebellum. Pontine neurons are born in the rhombic lip, a dorsal neuroepithelium lining the fourth ventricle (Wullmann, 2011).

Pontine neurons form a compact and superficial migratory stream which first progresses anteriorly before turning ventrally towards the floor plate (Geisen et al., 2008; Kratochwil et al., 2017; Zelina et al., 2014). Pontine neurons fail to migrate ventrally in *Ntn1* hypomorphic mutant and their number is reduced (Yee et al., 1999; Zelina et al., 2014). Here, we show that netrin-1, acting at least in part through the Dcc receptor, prevents pontine neurons and other classes of hindbrain commissural neurons from exiting the CNS through sensory nerve roots.

## Results

A few commissural axons project outside the spinal cord in netrin-1 hypomorph embryos (*Ntn1* <sup>$\beta$ geo/ $\beta$ geo</sup>) (Laumonnerie et al., 2014). We first confirmed this observation using immunostaining for Robo3 a marker of commissural neurons (Friocourt and Chédotal, 2017; Sabatier et al., 2004) on E11 embryos (Fig. 1A-L). To facilitate the analysis, whole-mount immunostaining was performed followed by 3DISCO clearing and three-dimensional (3D) imaging with light-sheet fluorescence microscopy (LSFM) (Belle et al., 2014). In *Ntn1* <sup>$\beta$ geo/+</sup> embryos, Robo3+ axons were restricted to the spinal cord, extending dorso-ventrally and crossing the midline (Fig. 1A, D and Fig. S1A, B and Movie 1), whereas in *Ntn1* <sup>$\beta$ geo/ $\beta$ geo</sup> embryos, Robo3 axons were also seen outside the spinal cord, within dorsal root ganglia (Drg) labeled with anti-islet1 (Fig. 1B, E and Fig. S1C, D). A few Robo3+ axons were also seen in the ventral roots (data not shown). Next, we studied a null allele of *Ntn1* (see methods), *Ntn1*<sup>-/-</sup>. Robo3+ axons also left the spinal cord in *Ntn1*<sup>-/-</sup> embryos (Fig. 1C, F and Fig. S1E, F; and Movie 2). Importantly, unlike in control embryos (Fig. 1G, H), Robo3+ axons were detected outside the CNS in the hindbrain, both in *Ntn1* <sup>$\beta$ geo/ $\beta$ geo</sup> embryos (Fig.

1I, J) and *Ntn1*<sup>-/-</sup> embryos (Fig. 1K, L). As in the spinal cord, commissural axons escaped the CNS via sensory roots and this was particularly striking at the trigeminal and vestibular nerve roots (Fig. 1K, L and Fig. S1G-J). The amount of Robo3<sup>+</sup> axons invading the PNS at the hindbrain level was significantly lower in *Ntn1*<sup>βgeo/βgeo</sup> compared to the *Ntn1*<sup>-/-</sup> embryos (Fig. S1S).

In the hindbrain, commissural neurons are produced at least until E16 (Pierce, 1966; Zelina et al., 2014). Therefore, we next studied *Ntn1* mutant embryos at E13 and E16. In control embryos, Robo3 axons were only found in the CNS (Fig. 1M, N and Movie 3) whereas in *Ntn1*<sup>βgeo/βgeo</sup> embryos and *Ntn1*<sup>-/-</sup> embryos, Robo3<sup>+</sup> axons massively invaded trigeminal and vestibular nerves and ganglia (Fig. 1O-R and Movie 4). This defect was more pronounced in *Ntn1*<sup>-/-</sup> than in *Ntn1*<sup>βgeo/βgeo</sup> mutants (Fig. S1T). At E16, only pontine neurons still express Robo3 in the hindbrain of control embryos (Fig. 2A-C and Movie 5) (Marillat et al., 2004; Zelina et al., 2014) suggesting that some of the Robo3<sup>+</sup> axons leaving the brain in *Ntn1*<sup>βgeo/βgeo</sup> (Fig. 2D-F) and *Ntn1*<sup>-/-</sup> (Fig. 2G-I) E16 embryos could belong to pontine neurons. This hypothesis was tested using immunostaining for Barhl1 and Pax6, two markers of migrating pontine neurons (Benzing et al., 2011; Zelina et al., 2014). In controls, the auditory and trigeminal nerves and ganglia did not contain Barhl1<sup>+</sup>/Robo3<sup>+</sup> or Pax6<sup>+</sup> neurons (Fig. 2A-C, J-N and Fig. S1K, L, O, P). By contrast, streams of Barhl1<sup>+</sup>/Robo3<sup>+</sup> or Pax6<sup>+</sup>/Robo3<sup>+</sup> cells were seen inside these nerves in *Ntn1*<sup>βgeo/βgeo</sup> (Fig. 2O-S and Fig. S1M, Q) and *Ntn1*<sup>-/-</sup> embryos (Fig. 2T-X, Fig. S1N, R and Movie S6), that could be traced back to the pontine migratory stream in the hindbrain (Fig. 2D-I). In wild type embryos, Barhl1<sup>+</sup>/Robo3<sup>+</sup> neurons are absent from trigeminal and vestibular ganglia which contains Sox10<sup>+</sup> sensory neurons (Fig. 2J-N). By contrast, there was a significant colonization of trigeminal and vestibular

nerves and ganglia by streams and clusters of Barhl1+ neurons in *Ntn1<sup>βgeo/βgeo</sup>* embryos and *Ntn1<sup>-/-</sup>* embryos (Fig. 2O-X and Fig. S1U). Ectopic Barhl1+ neurons were not immunoreactive for Sox10 (Fig. 2P, Q, U, V) but expressed Robo3 (Fig. 2R, S, W, X) supporting their pontine neuron identity.

To confirm that these neurons originated from the CNS, we electroporated a plasmid encoding green fluorescent protein (GFP) into the rhombic lip of *Ntn1<sup>-/-</sup>* E13.5 embryos (n=4) and collected them at E16. This selectively drives GFP expression in migrating pontine neurons (Kawauchi, 2006; Zelina et al., 2014). In all controls (n=10), GFP+ neurons were restricted to the hindbrain (Fig. 2Y), whereas in all *Ntn1<sup>-/-</sup>* embryos (Fig. 2Z, Z' and Movie 7), many GFP+/Robo3+ processes and cell bodies were found within the auditory and trigeminal nerves. Together, these data show that neurons maintaining a pontine identity transgress the PNS/CNS boundary in absence of netrin-1 and migrate along nerve roots. Their long-term fate could not be assessed as both types of *Ntn1* mutants die at birth.

Netrin-1 has either growth-promoting or growth-inhibiting activity and could act as a repulsive barrier at sensory nerve roots. However, *Ntn1* mRNA was absent from DRG and hindbrain sensory ganglia (Fig. S2A, C) and was just found in the floor plate, ventricular zone progenitors and cochlea as previously described (Abraira et al., 2008; Dominici et al., 2017; Laumonnerie et al., 2014; Serafini et al., 1994). These results were confirmed by monitoring β-galactosidase and netrin-1 protein expression in *Ntn1<sup>βgeo/+</sup>* E13 embryos (Fig. S2B, D). β-gal was present in floor plate and ventricular zone precursors and netrin-1 accumulated at the pial surface as recently described (Dominici et al., 2017; Varadarajan et al., 2017). It was also detected in the inner ear (Nishitani et al., 2017) and some mesenchymal cells but not in sensory ganglia. Netrin-1 levels were high in nestin-1+ radial glia endfeet but

stopped dorsally at the level of the vestibular and trigeminal nerve roots (Fig. S2E-F). Netrin-1 staining was abrogated in *Ntn1*<sup>-/-</sup> embryo but nestin-1+ glial endfeet were organized normally as previously described (Fig. S2G,H)(Dominici et al., 2017). Importantly, netrin-1 and  $\beta$ -gal were absent from commissural neurons, including migrating pontine neurons. The absence of netrin-1 in sensory ganglia and nerves suggests that it is unlikely to act as a repulsive barrier.

To further characterize netrin-1 function at the CNS/PNS boundary, we next performed selective genetic ablation of netrin-1 from various cellular sources using specific Cre-recombinase driver lines and a *Ntn1* conditional allele (*Ntn1*<sup>fl/fl</sup>)(Dominici et al., 2017). Cre expression was confirmed using a *Rosa*<sup>tdTomato</sup> reporter line (Fig. S2I-L). As in *Ntn1*<sup>fl/+</sup> (Fig. 3A-C), no Robo3+ axons were detected in the PNS of *Shh:Cre;Ntn1*<sup>fl/fl</sup> E13 embryos (Fig. 3D-F), which completely lack netrin-1 at the floor plate (Dominici et al., 2017) (Fig. S2I). Next, we studied *Nes:Cre;Ntn1*<sup>fl/fl</sup> E13 embryos in which netrin-1 is deleted from neural cells in the CNS and PNS but maintained in floor plate and inner ear (Fig. S2K)(Dominici et al., 2017). Interestingly, a massive invasion of peripheral nerve roots by commissural axons was seen in *Nes:Cre;Ntn1*<sup>fl/fl</sup> E13 embryos, with Robo3+ axons extending far in the trigeminal nerve branches and in the vestibular nerve (Fig. 3G-J). The phenotype was as severe than in *Ntn1*<sup>-/-</sup> and *Ntn1* <sup>$\beta$ geo/ $\beta$ geo</sup> mutants (Fig. S1T). At E16, streams of Barhl1+/Robo3 and Pax6+ pontine neurons were also detected within the trigeminal and auditory nerves (Fig. 3K-N and Fig. S1U). Interestingly, a subset of Foxp2+ cells, most likely corresponding to inferior olivary neurons (Dominici et al., 2017), also escaped the CNS in *Nes:Cre;Ntn1*<sup>fl/fl</sup> and *Ntn1*<sup>-/-</sup> E13 embryos, to enter the vagus nerve (Fig. 3O-R). Together, these data show that a massive exit of hindbrain

commissural neurons from the CNS is caused by the absence of netrin-1 from CNS cells.

Boundary cap (BC) cells might prevent commissural neuron from escaping the CNS as they do for motor neurons. To visualize BC cells in control and *Ntn1* mutant embryos we performed in situ hybridization for *Prss56* which encodes a potentially secreted trypsin-like serine protease highly expressed by BC cells (Coulpier et al., 2009). *Prss56*+ BC cells were found at the level of all nerve roots in the spinal cord and hindbrain both in wild type E11 and E13 embryos (Fig. S2M, N, Q, R) but also in *Ntn1*<sup>-/-</sup> mutant embryos (Fig. S2O, P, S, T). This shows that the invasion of the PNS by commissural neurons is not due to a lack of BC cells.

Netrin-1 has several receptors, including Dcc and Unc5s (Unc5a-d)(Ackerman et al., 1997; Kolodziej et al., 1996). It was previously shown that commissural axons also enter the DRGs in *Dcc* knockouts but not in *Unc5a/Unc5c* knockouts (Laumonnerie et al., 2014). We could confirm this result using whole-mount immunolabelling for Robo3 on E11 *Dcc*<sup>-/-</sup> embryos. As in *Ntn1* mutants, a Robo3+ axons were detected within the trigeminal and vestibular nerves at E11 (Fig. 4A, Table S3), E13 (Fig. 4B-D, Table S3) and E16 (Fig. 4E). Some were pontine neurons as shown with Pax6/Barhl1 immunolabelling (Fig. 4E-F). A similar defect was seen in a second *Dcc* null allele, *Dcc*<sup>Δ/Δ</sup>, resulting from the intercross of *Dcc*<sup>fl/fl</sup> mice to a line expressing cre in the germline (see methods; Fig. 4G). To determine if Dcc acts in pontine neurons to constrain their migration to the CNS, we next crossed the *Dcc*<sup>fl/fl</sup> mice to *Wnt1:Cre* line (Danielian et al., 1998; Zelina et al., 2014). As in *Dcc*<sup>-/-</sup> embryos, pontine neurons were unable to migrate towards the floor plate in *Dcc*<sup>Δ/Δ</sup> and *Wnt1:Cre;Dcc*<sup>fl/fl</sup> E16 embryos (Zelina et al., 2014 and data not shown). In addition, Robo3 axons and



Barhl1/Pax6+ neurons were found in the trigeminal and vestibular ganglia of *Wnt1:Cre;Dcc<sup>fl/fl</sup>* E16 embryos (Fig. 4H-K, L), indicating that a the lack of Dcc in pontine neurons induces some of them to exit the CNS (Fig. 4M).

## Discussion

At early developmental stages, neural crest cells migrate out of the neural tube to colonize the embryo to form most of the PNS and a variety of tissue and organs. However, after neural crest cell migration is completed, the PNS and the CNS segregate and newly born CNS cells remain confined to the CNS. Sensory axons from the PNS can still enter the CNS but at specific locations (such as the dorsal root entry zone in the spinal cord). In the CNS, motor axons will cross the CNS/PNS boundary to project to their target muscles, but boundary cap cells prevent motor neurons from entering the nerves. In vitro evidence also suggest that meninges might also control the CNS/PNS border (Suter et al., 2017). However, the cellular and molecular mechanisms which shape the CNS/PNS interface are not well characterized. Here we show, that netrin-1, secreted at the CNS basal lamina by neural precursor endfeet, prevent various populations of hindbrain commissural neurons, in particular pontine neurons, from migrating into the PNS through nerve roots. In the spinal cord and in the hindbrain, a subset of commissural axons is misguided from early developmental stages and project into nerve roots. Therefore, it is possible that these first escapers lead the way for later-born commissural neurons in particular precerebellar neurons which migrate close to the pial surface and in the vicinity of trigeminal and auditory nerve roots. We propose that commissural neurons do not actively avoid nerve roots in a repulsive manner, but that they preferentially extend on netrin-1 which appears largely absent from the nerve roots. Without netrin-

1, the growth of commissural axons and the migration of pontine neurons is more erratic, randomized and they can invade the nerve roots. Although motor neurons express Dcc, like commissural axons, their axons can extend into the PNS. However, it was previously shown that Dcc is inactive in motor neurons as it is cleaved by presenilin, and that they are unresponsive to netrin-1 within the spinal cord (Bai et al., 2011).

Interestingly, during normal development pontine neurons exhibit features of so-called collective migration, previously described for neural crest cells and lateral line neurons among others (Friedl and Mayor, 2017). Pontine neurons migrate along each other in a compact stream from the rhombic lip to the floor plate. We show that in the absence of netrin-1, pontine neurons cohesion appears affected and that some escape from the main stream to invade the nerve roots. This suggests that netrin-1 might control collective cell migration in this system. Our results suggest that Dcc mediates netrin-1 function at the CNS/PNS boundary. However, the milder pontine neuron migration defects observed in *Dcc* KO than in *Ntn1* KO indicate that another receptor, such as the Dcc paralogue neogenin (Keino-Masu et al., 1996) could also contribute. Unc5 receptors are unlikely to be involved as pontine neurons remain in the CNS in *Unc5b* and *Unc5c* knockouts (Di Meglio et al., 2013; Kim and Ackerman, 2011). Together, our results reveal a novel molecular mechanism controlling the establishment of the CNS/PNS boundary (Fig. 4M).

## Materials and Methods

### ***Mouse strains and genotyping***

*Ntn1* <sup>$\beta$ geo</sup> (Serafini et al., 1996) and *Dcc* (Fazeli et al., 1997) knockout lines were already described and genotyped by PCR. The *Ntn1* conditional knockout and the

*Ntn1* null-allele were generated as described elsewhere (Dominici et al., 2017). To generate a null-allele of *Dcc*, *Dcc<sup>fl/fl</sup>* mice (Krimpenfort et al., 2012) were crossed to *Krox20:Cre* mice which express Cre recombinase in both male and female germlines after sexual maturity (Voiculescu et al., 2000).

To ablate netrin-1 and *Dcc* expression from their different sources, we used different Cre lines: for the floor plate cells we used the *Shh:Cre* line (Harfe et al., 2004) (Jackson laboratories), for the ventricular zone precursors we used the *Nestin:Cre* line (Tronche et al., 1999) and finally for the rhombic lip derivatives (pontine neurons), we used the *Wnt1:Cre* line (Danielian et al., 1998). The Ai9 *Rosa<sup>tdTomato</sup>* reporter line (*Rosa<sup>Tom</sup>*; Jackson Laboratories) was used to analyze the Cre expression driven by the different lines. All mice were kept in C57BL/6 background and the day of females vaginal plug was counted as embryonic day 0.5 (E0.5). Mice were anesthetized with Ketamine (100mg/ml) and Xylazine (10mg/ml). All animal procedures were carried out in accordance to institutional guidelines and approved by the UPMC University ethic committee (Charles Darwin). Embryos of either sex were used.

### ***In situ hybridization***

Antisense RNA probes were labeled with digoxigenin-11-d-UTP (Roche Diagnostics, Indianapolis, IN) as described elsewhere (Marillat et al., 2004), by *in vitro* transcription of cDNA encoding mouse *ntn1* (Serafini et al., 1996), mouse *ntn1* exon 3 (Dominici et al., 2017) and mouse *prss56* (Coulpier et al., 2009).

### ***Immunohistochemistry***

Fixation was performed by embryo immersion in 4% paraformaldehyde in 0.12 M phosphate buffer, pH 7.4 (PFA) overnight (ON) at 4°C. Samples were cryoprotected in a solution of 10% sucrose, for E11 and E13 embryos, and 30% sucrose for E16 embryos, in 0.12M phosphate buffer (pH7.2), frozen in isopentane at -50°C.

Immunohistochemistry was performed on cryostat sections (20µm) after blocking in 0.2% gelatin in PBS containing 0.25% Triton-X100 (Sigma). Sections were then incubated ON at room temperature with the following primary antibodies: goat anti-human Robo3 (1:250, R&D Systems AF3076), goat anti-Dcc (1:500, Santa Cruz, sc-6535), rat anti-mouse netrin-1 (1:500, R&D Systems, MAB1109), mouse anti-Nestin-Alexa488 (1:1000, Abcam, ab197495), rabbit anti-βgal (1:500, Cappel, 55976), rabbit anti-Dsred (1:500, Clontech, 632496), rabbit anti-Pax6 (1:500, Millipore, AB2237), rabbit anti-Barhl1 (1:500, Sigma, HPA004809), rabbit anti-mouse Islet1 (1:500, Abcam, ab20670), anti-Sox10 (1:500, Santa Cruz, sc-17342), goat anti-FoxP2 (1:500, Santa Cruz, sc-21069), rabbit anti-FoxP2 (1:500, Abcam, ab16046). Corresponding secondary antibodies directly conjugated to fluorophores (Cy-5, Cy-3, Alexa-Fluor 647 from Jackson ImmunoResearch, or from Invitrogen) were incubated during 2 hours. For netrin-1 immunostaining, an antibody retrieval treatment was performed as described previously (Dominici et al., 2017). Sections were counterstained with Hoechst (1:1000, Sigma). Slides were scanned with a Nanozoomer (Hamamatsu) and laser scanning confocal microscope (FV1000, Olympus). Brightness and contrast were adjusted using Adobe Photoshop.

### ***Whole-mount labeling, 3DISCO and methanol clearing***

Whole-mount immunostaining, 3DISCO clearing procedures were previously described (Belle et al., 2014; Belle et al., 2017). 3D imaging was performed with an ultramicroscope using Inspector Pro software (LaVision BioTec). Images and 3D volume were generated using Imaris x64 software.

### ***In Utero Electroporation***

*In utero* electroporation of PN neurons was performed as described previously (Zelina et al., 2014), with some modifications. Endotoxin free plasmid DNA of pCX-EGFP (1 µg/µL) (provided by Dr M. Okabe, Osaka University, Japan) alone was diluted in PBS containing 0.01% Fast-green. 1 µL of diluted DNA was injected with a glass micropipette into the fourth ventricle of E13.5 mouse embryo. Five electric pulses (45 V, 50 ms, 950 ms interval between pulses) were applied with CUY21EDIT or NEPA21 electroporators (NepaGene, Ichikawa, Japan) using 5 mm diameter electrodes (CUY650-5, Nepagene). Electroporated embryos were partially dissected at E16 followed by whole-mount labeling using goat anti-human Robo3 (1:250, R&D Systems AF3076) and chicken anti-GFP (1:1000, Abcam, ab13970).

### ***Quantification and data analysis***

Two different individuals, blinded to the experimental conditions, performed Robo3+ axons volume and Barhl1+ cell quantifications. There was no randomization in the groups and any statistical method was used to predetermine sample sizes. Graphical representations show mean values ± standard deviation (s.d). Statistical significance was measured using one-sided unpaired tests for non-parametric tendencies (Kruskal-Wallis and Mann-Whitney). For Robo3+ volume quantifications, a background subtraction was performed followed by 3D volumetric analysis, using Imaris x64 software, to determine the total volume of Robo3+ fibers in the trigeminal nerve. The number of Barhl1+ cells in the auditory and trigeminal nerve roots was

quantified within a rectangular area (340x380µm) in 5 different sections. Two sections were taken at the auditory nerve root and three others at the trigeminal nerve root. Control embryos were from the same litters than the mutants. For both types of quantifications, at least 4 embryos of each genotype were quantified, from at least 2 different litters. In both quantifications, we considered significant differences when p-value < 0.05 (see all statistical values in Tables S1-S4).

All statistical analyses of the mean and variance were performed with Prism7 (GraphPad Software).

### **Acknowledgements**

We thank Dr Piotr Topilko for providing the *Prss56* cDNA. Dr Anton Berns for providing the *Dcc* conditional knockout line.

### **Competing interests**

None

### **Funding**

This work was supported by grants from the Agence Nationale de la Recherche (ANR-14-CE13-0004-01) (AC). It was performed in the frame of the LABEX LIFESENSES (reference ANR-10-LABX-65) supported by French state funds managed by the ANR within the Investissements d'Avenir programme under reference ANR-11-IDEX-0004-02 (AC).

## References

- Abraira, V. E., del Rio, T., Tucker, A. F., Slonimsky, J., Keirnes, H. L. and Goodrich, L. V.** (2008). Cross-repressive interactions between Lrig3 and netrin 1 shape the architecture of the inner ear. *Development* **135**, 4091–4099.
- Ackerman, S. L., Kozak, L. P., Przyborski, S. A., Rund, L. A., Boyer, B. B. and Knowles, B. B.** (1997). The mouse rostral cerebellar malformation gene encodes an UNC-5-like protein. *Nature* **386**, 838–842.
- Akin, O. and Zipursky, S. L.** (2016). Frazzled promotes growth cone attachment at the source of a Netrin gradient in the Drosophila visual system. *Elife* **5**.
- Bai, G., Chivatakarn, O., Bonanomi, D., Lettieri, K., Franco, L., Xia, C., Stein, E., Ma, L., Lewcock, J. W. and Pfaff, S. L.** (2011). Presenilin-dependent receptor processing is required for axon guidance. *Cell* **144**, 106–18.
- Belle, M., Godefroy, D., Dominici, C., Heitz-Marchaland, C., Zelina, P., Hellal, F., Bradke, F. and Chédotal, A.** (2014). A Simple Method for 3D Analysis of Immunolabeled Axonal Tracts in a Transparent Nervous System. *Cell Rep.* **9**, 1191–1201.
- Belle, M., Godefroy, D., Couly, G., Malone, S. A., Collier, F., Giacobini, P. and Chédotal, A.** (2017). Tridimensional Visualization and Analysis of Early Human Development. *Cell* **169**, 161–173.e12.
- Benzing, K., Flunkert, S., Schedl, A. and Engelkamp, D.** (2011). A Novel Approach to Selectively Target Neuronal Subpopulations Reveals Genetic Pathways That Regulate Tangential Migration in the Vertebrate Hindbrain. *PLoS Genet.* **7**, e1002099.
- Bron, R., Vermeren, M., Kokot, N., Andrews, W., Little, G. E., Mitchell, K. J. and**

**Cohen, J.** (2007). Boundary cap cells constrain spinal motor neuron somal migration at motor exit points by a semaphorin-plexin mechanism. *Neural Dev.* **2**, 21.

**Coulpier, F., Le Crom, S., Maro, G. S., Manent, J., Giovannini, M., Maciorowski, Z., Fischer, A., Gessler, M., Charnay, P. and Topilko, P.** (2009). Novel features of boundary cap cells revealed by the analysis of newly identified molecular markers. *Glia* **57**, 1450–1457.

**Danielian, P. S., Muccino, D., Rowitch, D. H., Michael, S. K. and McMahon, A. P.** (1998). Modification of gene activity in mouse embryos in utero by a tamoxifen-inducible form of Cre recombinase. *Curr Biol.* **8**, 1323-S2.

**Di Meglio, T., Kratochwil, C. F., Vilain, N., Loche, A., Vitobello, A., Yonehara, K., Hrycaj, S. M., Roska, B., Peters, A. H. F. M., Eichmann, A., et al.** (2013). Ezh2 Orchestrates Topographic Migration and Connectivity of Mouse Precerebellar Neurons. *Science* **339**, 204–207.

**Dominici, C., Moreno-Bravo, J. A., Puiggros, S. R., Rappeneau, Q., Rama, N., Vieugue, P., Bernet, A., Mehlen, P. and Chédotal, A.** (2017). Floor-plate-derived netrin-1 is dispensable for commissural axon guidance. *Nature* **545**, 350–354.

**Fazeli, A., Dickinson, S. L., Hermiston, M. L., Tighe, R. V, Steen, R. G., Small, C. G., Stoeckli, E. T., Keino-Masu, K., Masu, M., Rayburn, H., et al.** (1997). Phenotype of mice lacking functional Deleted in colorectal cancer (Dec) gene. *Nature* **386**, 796–804.

**Friedl, P. and Mayor, R.** (2017). Tuning Collective Cell Migration by Cell–Cell Junction Regulation. *Cold Spring Harb. Perspect. Biol.* **9**, a029199.

**Friocourt, F. and Chédotal, A.** (2017). The Robo3 receptor, a key player in the development, evolution, and function of commissural systems. *Dev Neurobiol.* **77**, 876–890.



**Garrett, A. M., Jucius, T. J., Sigaud, L. P. R., Tang, F.-L., Xiong, W.-C., Ackerman, S. L. and Burgess, R. W.** (2016). Analysis of Expression Pattern and Genetic Deletion of Netrin5 in the Developing Mouse. *Front Mol Neurosci.* **9**, 1–14.

**Geisen, M. J., Meglio, T. Di, Pasqualetti, M., Ducret, S., Brunet, J.-F., Chedotal, A. and Rijli, F. M.** (2008). Hox Paralog Group 2 Genes Control the Migration of Mouse Pontine Neurons through Slit-Robo Signaling. *PLoS Biol.* **6**, e142.

**Harfe, B. D., Scherz, P. J., Nissim, S., Tian, H., McMahon, A. P. and Tabin, C. J.** (2004). Evidence for an Expansion-Based Temporal Shh Gradient in Specifying Vertebrate Digit Identities. *Cell* **118**, 517–528.

**Kawauchi, D.** (2006). Direct visualization of nucleogenesis by precerebellar neurons: involvement of ventricle-directed, radial fibre-associated migration. *Development* **133**, 1113–1123.

**Keino-Masu, K., Masu, M., Hinck, L., Leonardo, E. D., Chan, S. S.-Y., Culotti, J. G. and Tessier-Lavigne, M.** (1996). Deleted in Colorectal Cancer (DCC) Encodes a Netrin Receptor. *Cell* **87**, 175–185.

**Kennedy, T. E., Serafini, T., de la Torre, J. and Tessier-Lavigne, M.** (1994). Netrins are diffusible chemotropic factors for commissural axons in the embryonic spinal cord. *Cell* **78**, 425–435.

**Kim, D. and Ackerman, S. L.** (2011). The UNC5C Netrin Receptor Regulates Dorsal Guidance of Mouse Hindbrain Axons. *J Neurosci.* **31**, 2167–2179.

**Kolodziej, P. A., Timpe, L. C., Mitchell, K. J., Fried, S. R., Goodman, C. S., Jan, L. Y. and Jan, Y. N.** (1996). frazzled Encodes a Drosophila Member of the DCC Immunoglobulin Subfamily and Is Required for CNS and Motor Axon Guidance. *Cell* **87**, 197–204.

**Kratochwil, C. F., Maheshwari, U. and Rijli, F. M.** (2017). The Long Journey of

Pontine Nuclei Neurons: From Rhombic Lip to Cortico-Ponto-Cerebellar Circuitry. *Front Neural Circuits* **11**, 1–19.

**Krimpenfort, P., Song, J.-Y., Proost, N., Zevenhoven, J., Jonkers, J. and Berns, A.** (2012). Deleted in colorectal carcinoma suppresses metastasis in p53-deficient mammary tumours. *Nature* **482**, 538–541.

**Kucenas, S., Wang, W.-D., Knapik, E. W. and Appel, B.** (2009). A Selective Glial Barrier at Motor Axon Exit Points Prevents Oligodendrocyte Migration from the Spinal Cord. *J Neurosci.* **29**, 15187–15194.

**Laumonnerie, C., Da Silva, R. V., Kania, A. and Wilson, S. I.** (2014). Netrin 1 and Dcc signalling are required for confinement of central axons within the central nervous system. *Development* **141**, 594–603.

**Li, W., Lee, J., Vikis, H. G., Lee, S.-H., Liu, G., Aurandt, J., Shen, T.-L., Fearon, E. R., Guan, J.-L., Han, M., et al.** (2004). Activation of FAK and Src are receptor-proximal events required for netrin signaling. *Nat Neurosci.* **7**, 1213–1221.

**Marillat, V., Sabatier, C., Failli, V., Matsunaga, E., Sotelo, C., Tessier-Lavigne, M. and Chédotal, A.** (2004). The Slit Receptor Rig-1/Robo3 Controls Midline Crossing by Hindbrain Precerebellar Neurons and Axons. *Neuron* **43**, 69–79.

**Mauti, O., Domanitskaya, E., Andermatt, I., Sadhu, R. and Stoeckli, E. T.** (2007). Semaphorin6A acts as a gate keeper between the central and the peripheral nervous system. *Neural Dev.* **2**, 28.

**Mehlen, P., Delloye-Bourgeois, C. and Chédotal, A.** (2011). Novel roles for Slits and netrins: axon guidance cues as anticancer targets? *Nat Rev Cancer* **11**, 188–197.

**Moore, S. W., Biais, N. and Sheetz, M. P.** (2009). Traction on Immobilized Netrin-1 Is Sufficient to Reorient Axons. *Science* **325**, 166–166.

- Nishitani, A. M., Ohta, S., Yung, A. R., del Rio, T., Gordon, M. I., Abraira, V. E., Avilés, E. C., Schoenwolf, G. C., Fekete, D. M. and Goodrich, L. V. (2017).** Distinct functions for netrin 1 in chicken and murine semicircular canal morphogenesis. *Development* **144**, 3349–3360.
- Pierce, E. T. (1966).** Histogenesis of the nuclei griseum pontis, corporis pontobulbaris and reticularis tegmenti pontis (Bechterew) in the mouse. An autoradiographic study. *J Comp Neurol.* **126**, 219–54.
- Sabatier, C., Plump, A. S., Le Ma, Brose, K., Tamada, A., Murakami, F., Lee, E. Y.-H. . and Tessier-Lavigne, M. (2004).** The Divergent Robo Family Protein R1/Robo3 Is a Negative Regulator of Slit Responsiveness Required for Midline Crossing by Commissural Axons. *Cell* **117**, 157–169.
- Serafini, T., Kennedy, T. E., Gaiko, M. J., Mirzayan, C., Jessell, T. M. and Tessier-Lavigne, M. (1994).** The netrins define a family of axon outgrowth-promoting proteins homologous to *C. elegans* UNC-6. *Cell* **78**, 409–424.
- Serafini, T., Colamarino, S. A., Leonardo, E. D., Wang, H., Beddington, R., Skarnes, W. C. and Tessier-Lavigne, M. (1996).** Netrin-1 is required for commissural axon guidance in the developing vertebrate nervous system. *Cell* **87**, 1001–14.
- Stanco, A. and Anton, E. S. (2013).** Radial Migration of Neurons in the Cerebral Cortex. In *Cellular Migration and Formation of Neuronal Connections* (ed. Rubenstein, J. L. R.) and Rakic, P.), pp. 317–330. Elsevier.
- Suter, T. A. C. S., DeLoughery, Z. J. and Jaworski, A. (2017).** Meninges-derived cues control axon guidance. *Dev Biol.* **430**, 1–10.
- Tronche, F., Kellendonk, C., Kretz, O., Gass, P., Anlag, K., Orban, P. C., Bock, R., Klein, R. and Schütz, G. (1999).** No Title. *Nat Genet.* **23**, 99–103.

**Varadarajan, S. G., Kong, J. H., Phan, K. D., Kao, T.-J., Panaitof, S. C., Cardin, J., Eltzschig, H., Kania, A., Novitch, B. G. and Butler, S. J.** (2017). Netrin1 Produced by Neural Progenitors, Not Floor Plate Cells, Is Required for Axon Guidance in the Spinal Cord. *Neuron* **94**, 790–799.e3.

**Vermeren, M., Maro, G. S., Bron, R., McGonnell, I. M., Charnay, P., Topilko, P. and Cohen, J.** (2003). Integrity of Developing Spinal Motor Columns Is Regulated by Neural Crest Derivatives at Motor Exit Points. *Neuron* **37**, 403–415.

**Voiculescu, O., Charnay, P. and Schneider-Maunoury, S.** (2000). Expression pattern of aKrox-20/Cre knock-in allele in the developing hindbrain, bones, and peripheral nervous system. *Genesis* **26**, 123–126.

**Wullmann, M.** (2011). The long adventurous journey of rhombic lip cells in jawed vertebrates: a comparative developmental analysis. *Front Neuroanat.* **5**, 27.

**Yee, K. T., Simon, H. H., Tessier-Lavigne, M. and O’Leary, D. D. .** (1999). Extension of Long Leading Processes and Neuronal Migration in the Mammalian Brain Directed by the Chemoattractant Netrin-1. *Neuron* **24**, 607–622.

**Zelina, P., Blockus, H., Zagar, Y., Péres, A., Friocourt, F., Wu, Z., Rama, N., Fouquet, C., Hohenester, E., Tessier-Lavigne, M., et al.** (2014). Signaling Switch of the Axon Guidance Receptor Robo3 during Vertebrate Evolution. *Neuron* **84**, 1258–1272.

## Figures

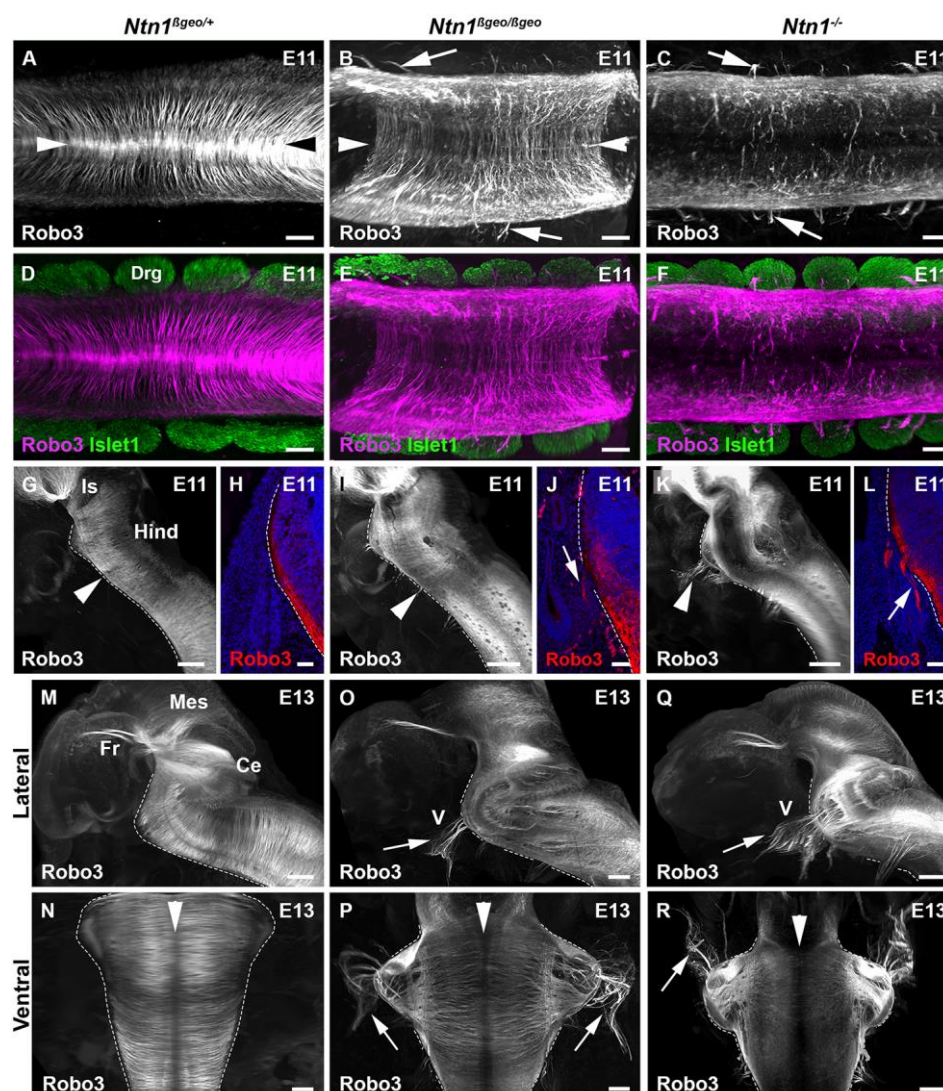

**Figure 1**

### **Netrin-1 prevents commissural axon exit from the central nervous system**

**A-F**, LSFM images of the spinal cord of E11 embryos immunolabelled for Robo3 and Islet-1. In wild type (**A**, **D**; n=3), commissural axons extend dorso-ventrally towards the floor plate (arrowheads in **A**), and are absent from islet1+ dorsal root ganglia (**D**). In *Ntn1*<sup>βgeo/βgeo</sup> (**B**, **E**; n=5) and *Ntn1*<sup>-/-</sup> (**C**, **F**; n=6) mutants, some Robo3+

commissural neurons exit the spinal cord and invade Drgs (arrows in B and C). **G, H** In wild type E11 hindbrain, Robo3+ axons are also confined to the CNS (arrowhead in **G**, n=5). In *Ntn1<sup>βgeo/βgeo</sup>* (**I, J**; n=4) and *Ntn1<sup>-/-</sup>* (**K, L**; n=6) mutants, Robo3+ axons exit the CNS via sensory roots (arrowheads in **I, K** and arrows in **J** and **L**). **M-R**, At E13, hindbrain commissural axons still express Robo3 (**M** and **N**; n=5). In *Ntn1<sup>βgeo/βgeo</sup>* (**O** and **P**, n=4) and *Ntn1<sup>-/-</sup>* (**Q** and **R**; n=6) knockouts, commissural axons invade the trigeminal nerve (V; arrows in **O, P, Q** and **R**). The arrowheads in **N, P** and **R** indicate the ventral midline. Abbreviations: Ce, cerebellum; Hind, hindbrain; Is, isthmus; Mes, mesencephalon; Fr; Fasciculus retroflexus. Scale bars; 50μm (H, J, L), 100μm (A-F), 300μm (G, K, I), 400μm (M-R).



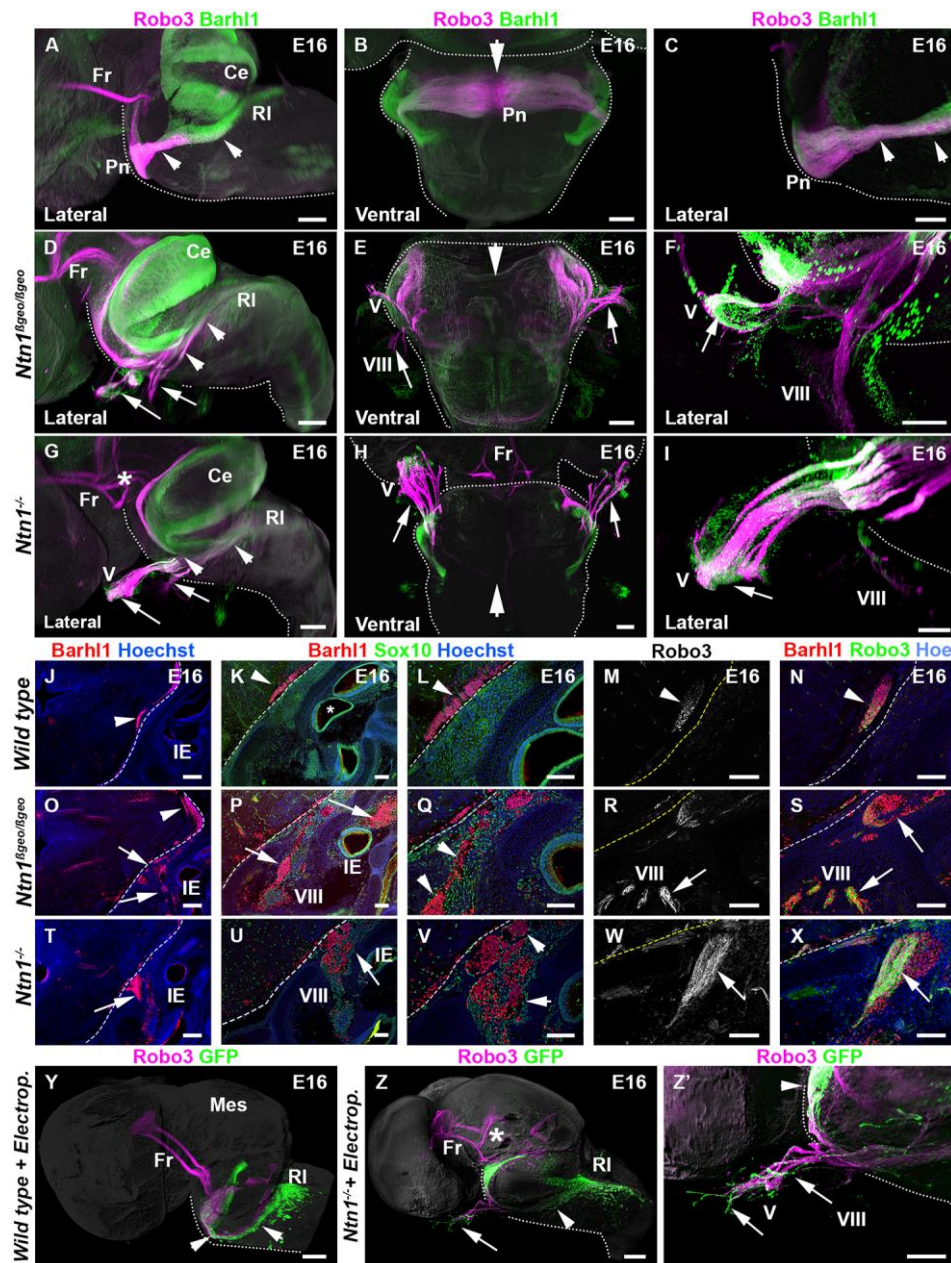

**Figure 2**

## Migrating pontine neurons invade the peripheral nervous system in absence of netrin-1

**A-I**, 3D LSFM images of whole-mount E16 embryos labeled with anti-Robo3 (magenta) and anti-Barhl1 (green) antibodies. **A-C**, In wild type, pontine neurons (Pn) leave the rhombic lip dorsally (RI) and migrate under the pial surface (dotted line in A-C) to the floor plate (arrowhead in B) along the anterior extramural stream

(arrowheads in A and C, n=6). **D-I**, In *Ntn1* <sup>$\beta$ geo/ $\beta$ geo</sup> (**D-F**; n=5) and *Ntn1*<sup>-/-</sup> (**G-I**; n=5) mutants, pontine neurons leave the rhombic lip (arrowheads in **D** and **G**), but neuronal chains exit the CNS by the auditory (VIII and short arrow) and trigeminal (V) nerves (arrow). Pontine neurons fail to reach the midline in absence of netrin-1 (arrowhead in **E** and **H**). The asterisk in **G** indicates the abnormal fasciculus retroflexus (Fr). **J-X**, E16 hindbrain cryosections. In wild type (**J-N**; n=5) Barhl1+ pontine neurons are confined to the CNS (arrowheads in J, K and L) and express Robo3 (arrowhead in N). Barhl1+ cells are not immunoreactive for Sox10, a neural crest cell and drg neuron marker (**K, L**; n=5). In *Ntn1* mutants (**O-X**) a fraction of Barhl1+/Robo3+ PN neurons (arrows) migrate into the trigeminal (V) and auditory nerves and reach the inner ear (IE). These cells don't express Sox10 (arrowhead in **Q**, n=4 and **V** n=5). **Y-Z'**, LSM images of E16 embryos electroporated at E13, with GFP. Whole-mount GFP and Robo3 immunostaining and 3DISCO clearing. In wild type (**Y**; n=3) GFP+ PN neurons (arrowheads) are restricted to the CNS migrating from the rhombic lip (RL) to the midline. In all *Ntn1*<sup>-/-</sup> mutants (**Z** and **Z'**; n=4), Robo3+ and GFP+ neurons migrate from the rhombic lip (arrowhead in **Z**) but some exit the CNS and invade the trigeminal nerve (arrows in **Z'**). Abbreviations: Ce, cerebellum. Dotted lines in the panels represent the CNS limit. Scale bars, (J-X), 300 $\mu$ m (B, C, E, F, H, I), 500 $\mu$ m (A, D, G, Y, Z, Z').





nerves. M and N are hindbrain cryosections showing Barhl1 (**M**) and Pax6 (**N**) immunopositive cell bodies in the auditory nerve. Dotted lines in the panels delineate the CNS limit (n=5). **O-R**, Coronal sections of E13 embryos immunolabelled for Foxp2, an inferior olivary (IO) neuron marker. The dotted line delineates the vagus nerve. In wild type (**O**, n=6) and *Shh:Cre; Ntn1<sup>fl/fl</sup>* embryos (**P**; n=4), Foxp2<sup>+</sup> IO neurons only migrate within the CNS. By contrast a subset of Foxp2<sup>+</sup> cells leave the CNS (arrows) to enter the vagus nerve in *Nes:Cre;Ntn1<sup>fl/fl</sup>* (**Q**; n=4) and *Ntn1<sup>-/-</sup>* mutants (**R**; n=4). Abbreviations: Ce, cerebellum; Fr, fasciculus retroflexus; Hind, hindbrain; Mes, mesencephalon. Scale bars, 50µm (O-R), 100µm (C, F, J, M, N), 150µm (B, L, H), 200µm (I), 300µm (A, D, G) and 500µm (K).

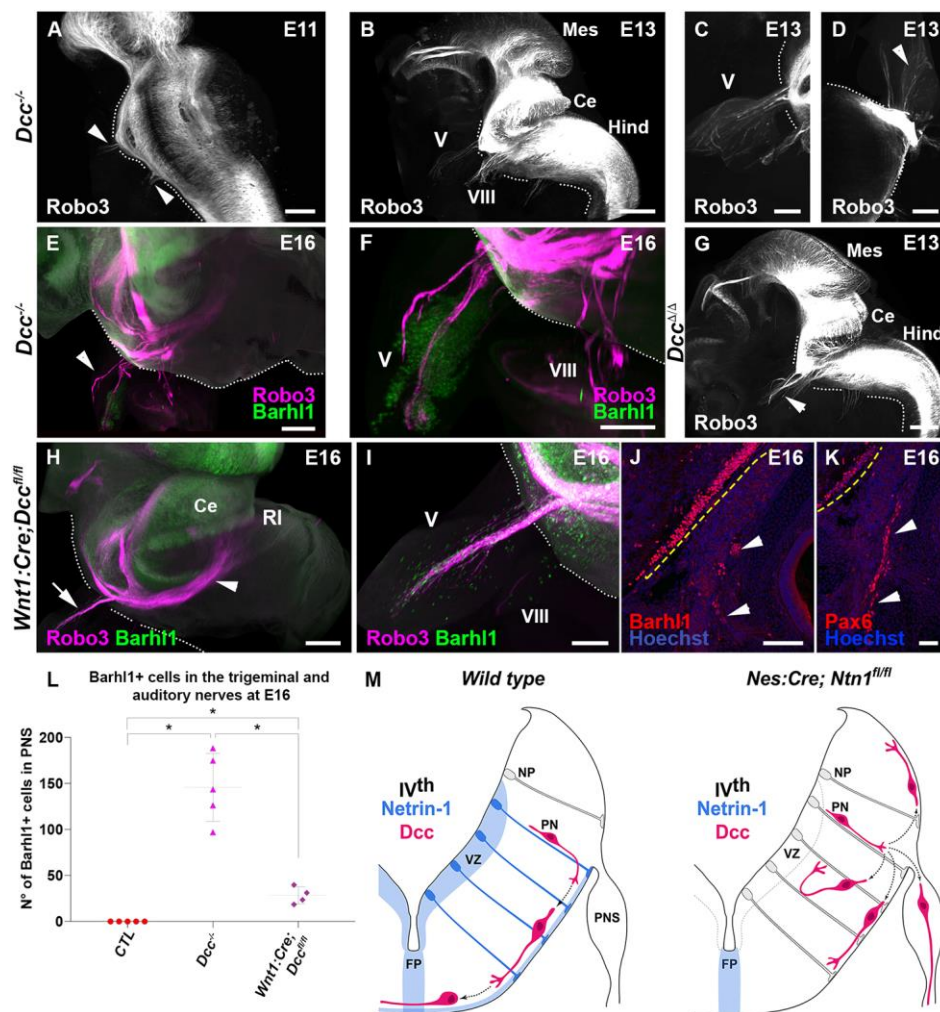

**Figure 4**

### The CNS confinement of commissural neurons involves *Dcc*.

**A-I**, LSFM images of 3DISCO-cleared embryos. **A-F**, In E11 (**A**, n=4) and E13 (**B-D**; n=4) *Dcc*<sup>-/-</sup> mutants some Robo3+ commissural axons exit the CNS through nerve roots (arrowheads in **A**) including the trigeminal (V and arrowhead in **D**) and auditory (VIII) nerves. At E16, Barhl1+/Robo3+ pontine neurons enter the trigeminal nerve (arrowheads in **E**, **F** n=3). **G**, The invasion of the PNS by Robo3+ axons (arrowhead) is also observed in E13 *Dcc*<sup>Δ/Δ</sup> mutants (n=3). **H-K**, In *Wnt1:Cre;Dcc*<sup>fl/fl</sup> mutants, a stream of Robo3+/Barhl1+ pontine neurons migrate from the rhombic lip (RL, arrow) but some enter the trigeminal nerve (arrowhead). **J**, **K**, Coronal sections showing the

presence in the PNS of Barhl1+ and Pax6+ pontine neurons in the inner ear (arrowheads, n=4). **L**, Quantification of the number of Barhl1+ cells in the auditory and trigeminal nerves in control, *Dcc*<sup>-/-</sup> and *Wnt1:Cre; Dcc*<sup>fl/fl</sup> E16 cryosections (see Table S4). **M**, Schematic representations of precerebellar neuron migration in control and Ntn1-deficient mice. Abbreviations: Ce, cerebellum; Hind, hindbrain; PN, precerebellar neuron; NP, neural precursor; VZ, ventricular zone; FP, floor plate; PNS, peripheral nervous system. Dotted lines in the panels represent the CNS limit. Scale bars, 50µm (K) 100µm (J), 200µm (C, D,I), 400µm (A, B, E, F, H).



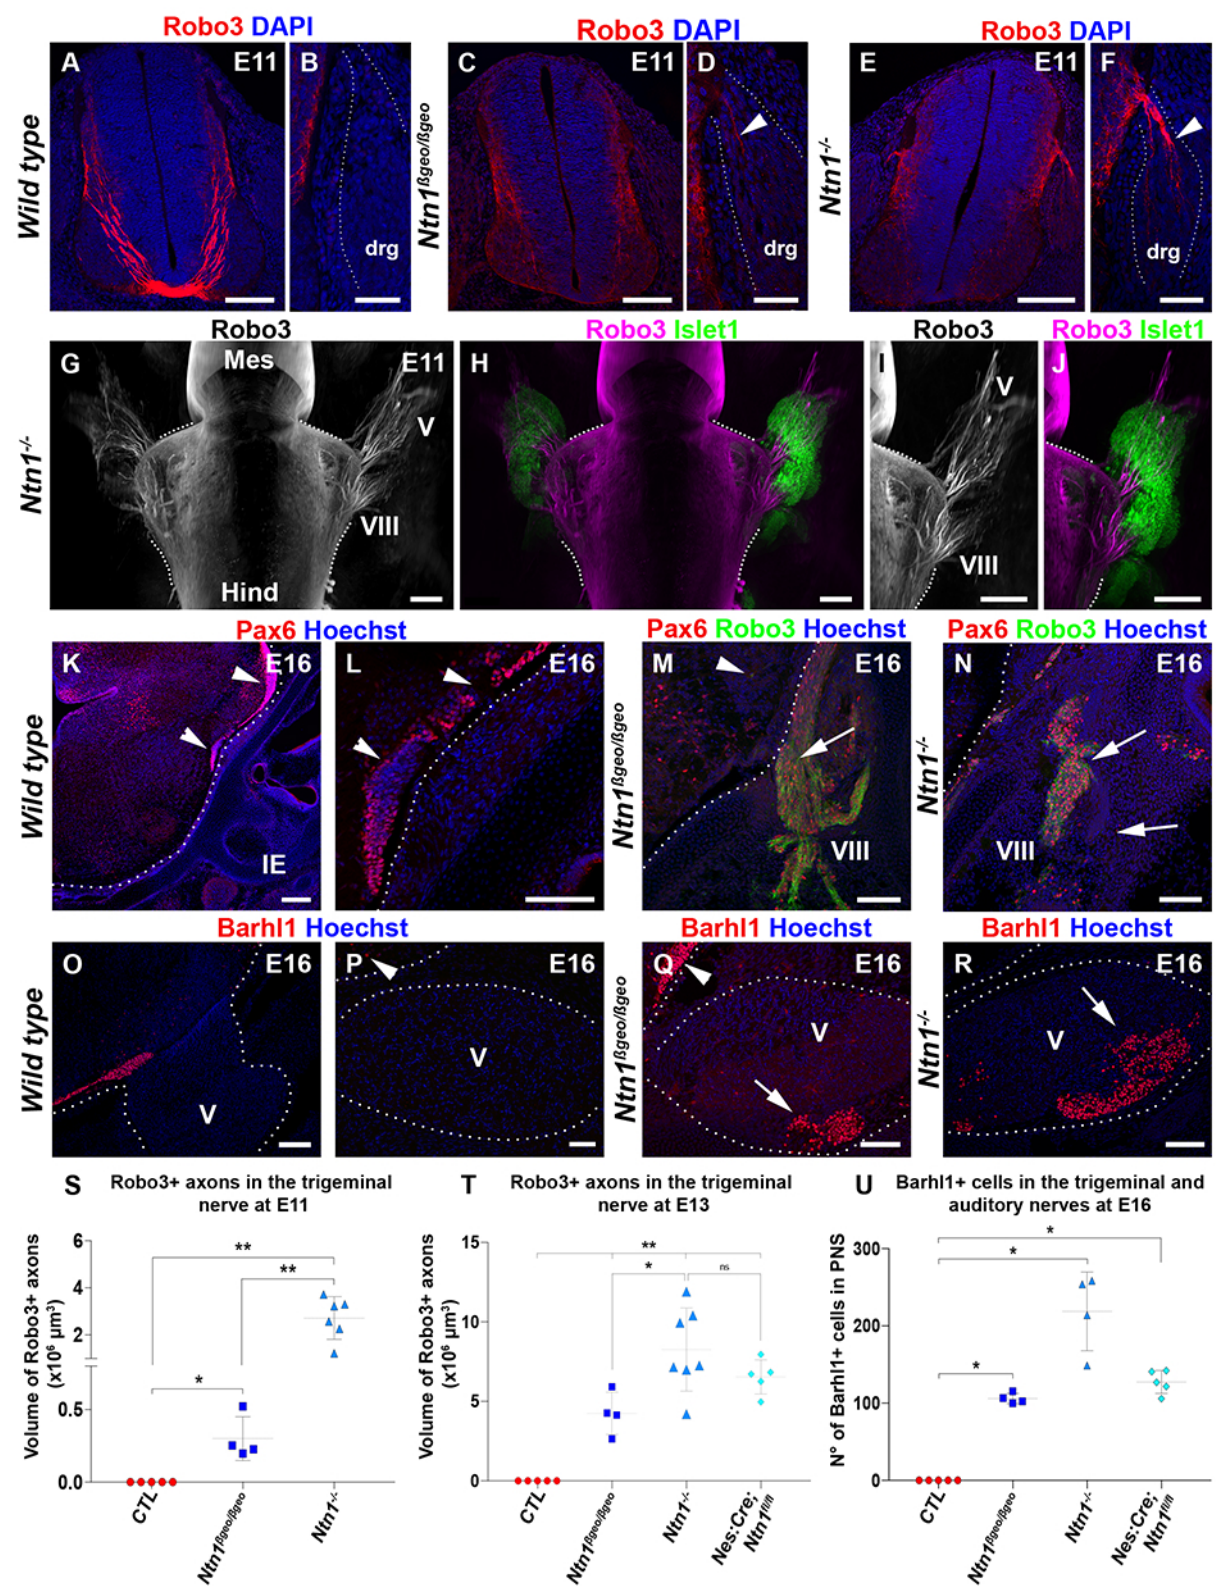

Figure S1

## Supplementary Figure 1

### Commissural axons exit the CNS by different nerve roots in absence of netrin-1

A-F, Coronal sections of E11 spinal cords immunolabelled for Robo3 and counterstained with DAPI. In wild type (A, B; n=3) Robo3 axons are only found in the CNS. In *Ntn1<sup>βgeo/βgeo</sup>* (C, D; n=5) and *Ntn1<sup>-/-</sup>* (E, F; n=6) mutants, Robo3+ commissural axons invade the dorsal root ganglia (drg, arrowhead and dotted lines). G-J, LSM images of ventral views of *Ntn1<sup>-/-</sup>* E11 embryo illustrating the invasion of the trigeminal (V) and auditory (VIII) nerves and ganglia. Trigeminal neurons are immunolabelled for Islet1 (H, J, n=3). K-R, are coronal sections of the hindbrain of E16 embryos. In wild type, Pax6+ (K, L; n=5) and Barhl1+ (O, P; n=5) pontine neurons (arrowheads) migrate under the CNS/PNS boundary (dotted line). In *Ntn1<sup>βgeo/βgeo</sup>* (M, Q; n=4) and *Ntn1<sup>-/-</sup>* (N, R; n=5) mutants, both Pax6 and Barhl1+ cells exit the brainstem and migrate in the PNS (arrows). They also express Robo3, confirming their commissural neuron identity (M, N). S, T, Quantification of the volume of Robo3+ axons invading the trigeminal nerve at E11 (S) and E13 (T) in *Ntn1<sup>βgeo/βgeo</sup>*, *Ntn1<sup>-/-</sup>* and *Nes:Cre; Ntn1<sup>fl/fl</sup>* embryos (Table S1). U, Quantification of the number of Barhl1+ cells in the auditory and trigeminal nerve roots in *Ntn1<sup>βgeo/βgeo</sup>*, *Ntn1<sup>-/-</sup>* and *Nes:Cre; Ntn1<sup>fl/fl</sup>* E16 cryosections (Table S2). Abbreviations: Mes, mesencephalon; Hind, hindbrain. Dotted lines delineate the CNS limit. Scale bars, 50 μm (B, D, F), 100 μm (A, C, E, K-R), 200 μm (H, I, J).



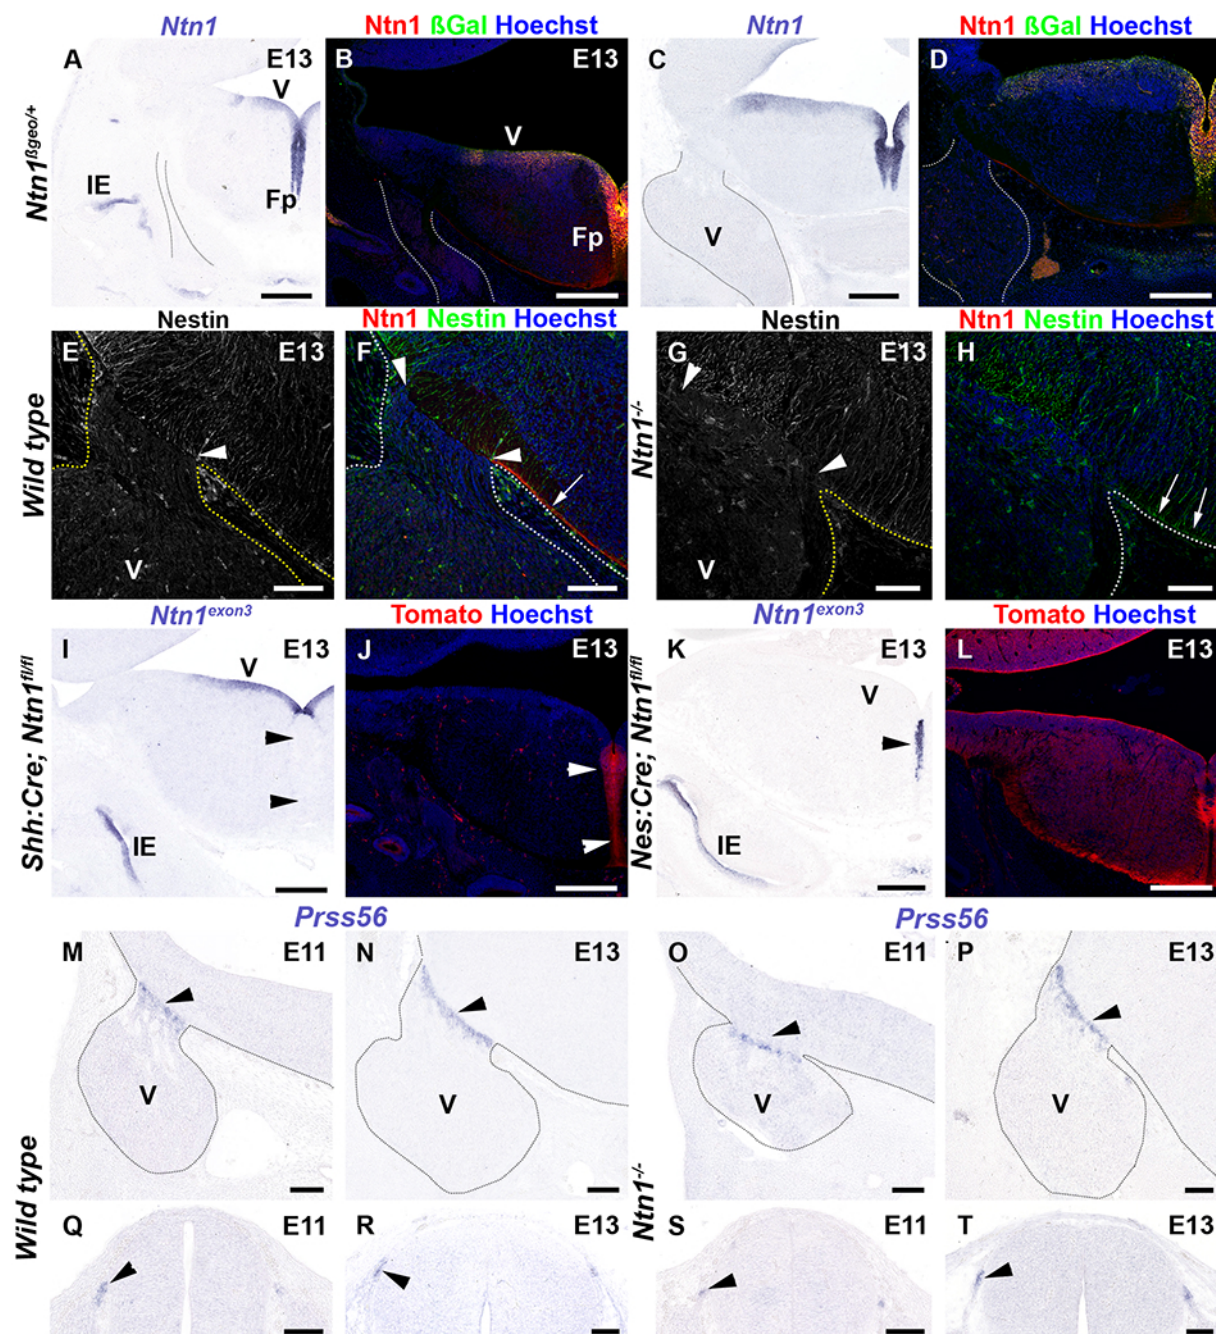

Figure S2

## Supplementary Figure 2

### Netrin-1 is not expressed at the level of hindbrain sensory roots.

Coronal sections at the level of the hindbrain (A-P) and spinal cord (Q-T).

A-D, In E13 *Ntn1* <sup>$\beta$ geo/+</sup> control embryo, *netrin-1* mRNA,  $\beta$ -galactosidase and netrin-1 immunoreactivity are found at the floor plate (Fp), ventricular zone (V) and the inner ear (IE). No netrin-1 is detected in nerves and ganglia (dotted lines, n=6). E-H, In E13 wild type embryos, the radial processes of Nestin+ ventricular zone progenitors extend to the pial surface at the level of the trigeminal nerve root (between arrowheads). Netrin-1 protein is found along the basal lamina (arrow in F, n=6) except at the trigeminal nerve root (arrowheads in F). In *Ntn1*<sup>-/-</sup> (G and H; n=6) mutants, Nestin+ fibers still reach the pial surface (arrowheads in G) even if netrin-1 protein is absent (arrows in H). I-J, In *Shh:Cre; Ntn1*<sup>fl/fl</sup> mutants, *netrin-1* mRNA is deleted from the floor plate (arrowheads in I; n=5) where tomato expression is induced by Cre recombinase (arrowheads in J; n=3). K-L, In *Nes:Cre;Ntn1*<sup>fl/fl</sup> mutants, *netrin-1* mRNA expression is ablated from the ventricular zone (v) and maintained in the floor plate (arrowhead in J; n=5) and the inner ear (IE). Tomato expression is induced throughout the CNS except the floor plate (L; n=3). M-T, In wild type E11 and E13 embryos, boundary cap cells express *Prss56* mRNA (arrowheads) at nerve roots in the hindbrain (M, N; n=3) and spinal cord (Q, R; n=3). This is also the case in *Ntn1*<sup>-/-</sup> mutants embryos (arrowheads in O, P, S, T; n=3). Abbreviation: IE, inner ear; V, trigeminal ganglion. Scale bars, 100  $\mu$ m (E, H, M-T), 250  $\mu$ m (A-D, I-L).



**Supplementary table 1****Volume of Robo3+ axons in the trigeminal ganglion at E11 and E13 in *Ntn1* mutants**

| Genotype (E11)                                                                                    | Number of cases      | Mean $\pm$ SD ( $\times 10^6 \mu\text{m}^3$ ) |
|---------------------------------------------------------------------------------------------------|----------------------|-----------------------------------------------|
| <i>CTL</i>                                                                                        | n = 5                | 0 $\pm$ 0                                     |
| <i>Ntn1</i> <sup><math>\beta\text{Geo}/\beta\text{Geo}</math></sup>                               | n = 4                | 0.3 $\pm$ 0.15                                |
| <i>Ntn1</i> <sup>-/-</sup>                                                                        | n = 6                | 2.72 $\pm$ 0.90                               |
| Genotype comparison                                                                               | Mann-Whitney test    | Kruskal-Wallis test                           |
| <i>CTL</i> vs <i>Ntn1</i> <sup><math>\beta\text{Geo}/\beta\text{Geo}</math></sup>                 | p-value = 0.008 (**) | p-value < 0.0001 (***)                        |
| <i>CTL</i> vs <i>Ntn1</i> <sup>-/-</sup>                                                          | p-value = 0.004 (**) |                                               |
| <i>Ntn1</i> <sup><math>\beta\text{Geo}/\beta\text{Geo}</math></sup> vs <i>Ntn1</i> <sup>-/-</sup> | p-value = 0.009 (**) |                                               |

| Genotype (E13)                                                                                               | Number of cases      | Mean $\pm$ SD ( $\times 10^6 \mu\text{m}^3$ ) |
|--------------------------------------------------------------------------------------------------------------|----------------------|-----------------------------------------------|
| <i>CTL</i>                                                                                                   | n = 5                | 0 $\pm$ 0                                     |
| <i>Ntn1</i> <sup><math>\beta\text{Geo}/\beta\text{Geo}</math></sup>                                          | n = 4                | 4.25 $\pm$ 1.33                               |
| <i>Ntn1</i> <sup>-/-</sup>                                                                                   | n = 7                | 8.26 $\pm$ 2.61                               |
| <i>Nes:Cre; Ntn1</i> <sup>fl/fl</sup>                                                                        | n = 5                | 6.55 $\pm$ 1.08                               |
| Genotype comparison                                                                                          | Mann-Whitney test    | Kruskal-Wallis test                           |
| <i>CTL</i> vs <i>Ntn1</i> <sup><math>\beta\text{Geo}/\beta\text{Geo}</math></sup>                            | p-value = 0.008 (**) | p-value = 0.0013 (**)                         |
| <i>CTL</i> vs <i>Ntn1</i> <sup>-/-</sup>                                                                     | p-value = 0.003 (**) |                                               |
| <i>CTL</i> vs <i>Nes:Cre; Ntn1</i> <sup>fl/fl</sup>                                                          | p-value = 0.008 (**) |                                               |
| <i>Ntn1</i> <sup><math>\beta\text{Geo}/\beta\text{Geo}</math></sup> vs <i>Ntn1</i> <sup>-/-</sup>            | p-value = 0.024 (*)  |                                               |
| <i>Ntn1</i> <sup><math>\beta\text{Geo}/\beta\text{Geo}</math></sup> vs <i>Nes:Cre; Ntn1</i> <sup>fl/fl</sup> | p-value = 0.032 (*)  |                                               |
| <i>Ntn1</i> <sup>-/-</sup> vs <i>Nes:Cre; Ntn1</i> <sup>fl/fl</sup>                                          | p-value = 0.149 (ns) |                                               |

**Supplementary table 2**

**Number of Barhl1+ cells in the auditory and trigeminal nerve roots at E16 in *Ntn1* mutants**

| Genotype                                                                                                    | Number of cases      | Mean $\pm$ SD (n° cells) |
|-------------------------------------------------------------------------------------------------------------|----------------------|--------------------------|
| <i>CTL</i>                                                                                                  | n = 5                | 0 $\pm$ 0                |
| <i>Ntn1</i> <sup><math>\beta</math>Geo/<math>\beta</math>Geo</sup>                                          | n = 4                | 106.1 $\pm$ 6.77         |
| <i>Ntn1</i> <sup>-/-</sup>                                                                                  | n = 4                | 218.8 $\pm$ 50.82        |
| <i>Nes:Cre; Ntn1</i> <sup>fl/fl</sup>                                                                       | n = 5                | 127.4 $\pm$ 14.94        |
| Genotype comparison                                                                                         | Mann-Whitney test    | Kruskal-Wallis test      |
| <i>CTL</i> vs <i>Ntn1</i> <sup><math>\beta</math>Geo/<math>\beta</math>Geo</sup>                            | p-value = 0.008 (**) | p-value < 0.0001 (***)   |
| <i>CTL</i> vs <i>Ntn1</i> <sup>-/-</sup>                                                                    | p-value = 0.008 (**) |                          |
| <i>CTL</i> vs <i>Nes:Cre; Ntn1</i> <sup>fl/fl</sup>                                                         | p-value = 0.008 (**) |                          |
| <i>Ntn1</i> <sup><math>\beta</math>Geo/<math>\beta</math>Geo</sup> vs <i>Ntn1</i> <sup>-/-</sup>            | p-value = 0.029 (*)  |                          |
| <i>Ntn1</i> <sup><math>\beta</math>Geo/<math>\beta</math>Geo</sup> vs <i>Nes:Cre; Ntn1</i> <sup>fl/fl</sup> | p-value = 0.064 (ns) |                          |
| <i>Ntn1</i> <sup>-/-</sup> vs <i>Nes:Cre; Ntn1</i> <sup>fl/fl</sup>                                         | p-value = 0.016 (*)  |                          |

**Supplementary table 3**

**Volume of Robo3+ axons in the trigeminal ganglion at E11 and E13 in *Dcc* KO**

| Genotype (E11)                          | Number of cases     | Mean $\pm$ SD (n° cells) |
|-----------------------------------------|---------------------|--------------------------|
| <i>CTL</i>                              | n = 4               | 0 $\pm$ 0                |
| <i>Dcc</i> <sup>-/-</sup>               | n = 4               | 1.078 $\pm$ 1.24         |
| Genotype comparison                     | Mann-Whitney test   | Kruskal-Wallis test      |
| <i>CTL</i> vs <i>Dcc</i> <sup>-/-</sup> | p-value = 0.029 (*) | Not necessary            |

| Genotype (E13)                          | Number of cases     | Mean $\pm$ SD (n° cells) |
|-----------------------------------------|---------------------|--------------------------|
| <i>CTL</i>                              | n = 4               | 0 $\pm$ 0                |
| <i>Dcc</i> <sup>-/-</sup>               | n = 4               | 5.258 $\pm$ 2.054        |
| Genotype comparison                     | Mann-Whitney test   | Kruskal-Wallis test      |
| <i>CTL</i> vs <i>Dcc</i> <sup>-/-</sup> | p-value = 0.029 (*) | Not necessary            |

**Supplementary table 4**

**Number of Barhl1+ cells in the auditory and trigeminal nerve roots at E16 in Dcc mutants**

| Genotype                                                           | Number of cases      | Mean $\pm$ SD (n° cells) |
|--------------------------------------------------------------------|----------------------|--------------------------|
| <i>CTL</i>                                                         | n = 5                | 0 $\pm$ 0                |
| <i>Dcc</i> <sup>-/-</sup>                                          | n = 5                | 146 $\pm$ 36.83          |
| <i>Wnt1:Cre; Dcc</i> <sup>fl/fl</sup>                              | n = 4                | 28.3 $\pm$ 9.25          |
| Genotype comparison                                                | Mann-Whitney test    | Kruskal-Wallis test      |
| <i>CTL</i> vs <i>Dcc</i> <sup>-/-</sup>                            | p-value = 0.008 (**) | p-value < 0.0001 (***)   |
| <i>CTL</i> vs <i>Wnt1:Cre; Dcc</i> <sup>fl/fl</sup>                | p-value = 0.008 (**) |                          |
| <i>Dcc</i> <sup>-/-</sup> vs <i>Wnt1:Cre; Dcc</i> <sup>fl/fl</sup> | p-value = 0.016 (*)  |                          |

## Movies

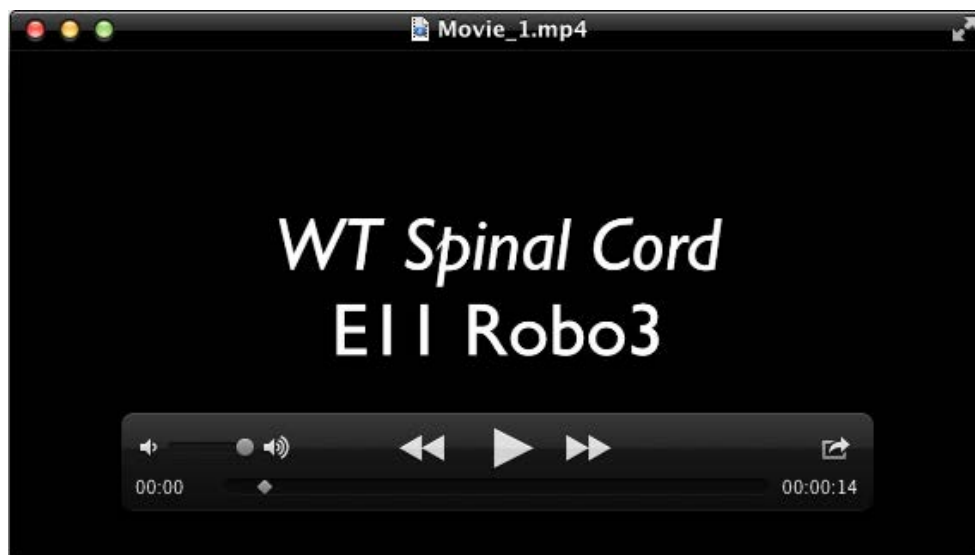

### Movie 1

3D movie of 3DISCO-cleared spinal cord from an E11 wild type embryo showing the restriction of Robo3-immunoreactive commissural axons to the CNS.

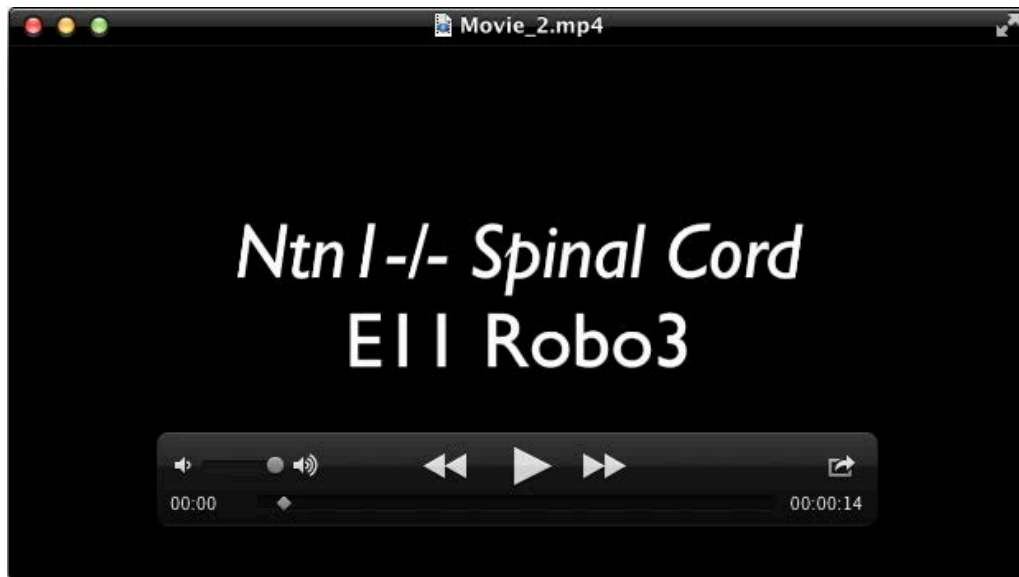

## Movie 2

3D movie of 3DISCO-cleared spinal cord from an E11 *Ntn1*<sup>-/-</sup> embryo showing the invasion of dorsal root ganglia (Drg) by a subset of Robo3-immunoreactive commissural axons.

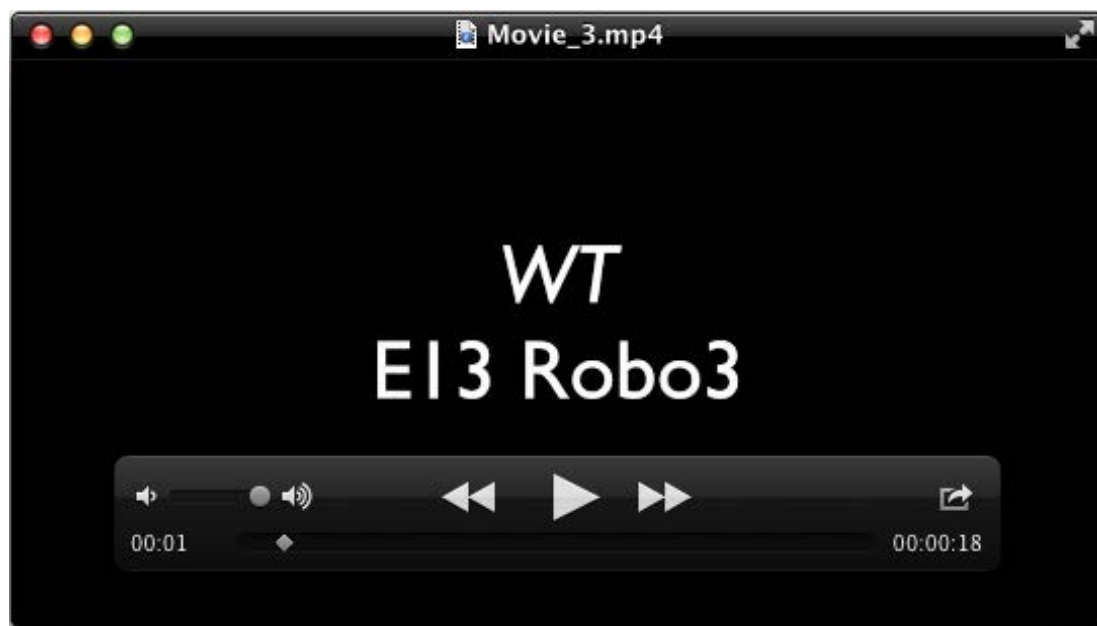

### Movie 3

3D movie of 3DISCO-cleared E13 wild type embryo. All Robo3+ axons are confined to the CNS. Abbreviations: Ce, cerebellum; Hind, hindbrain; Mes, mesencephalon; Fr; Fasciculus retroflexus.

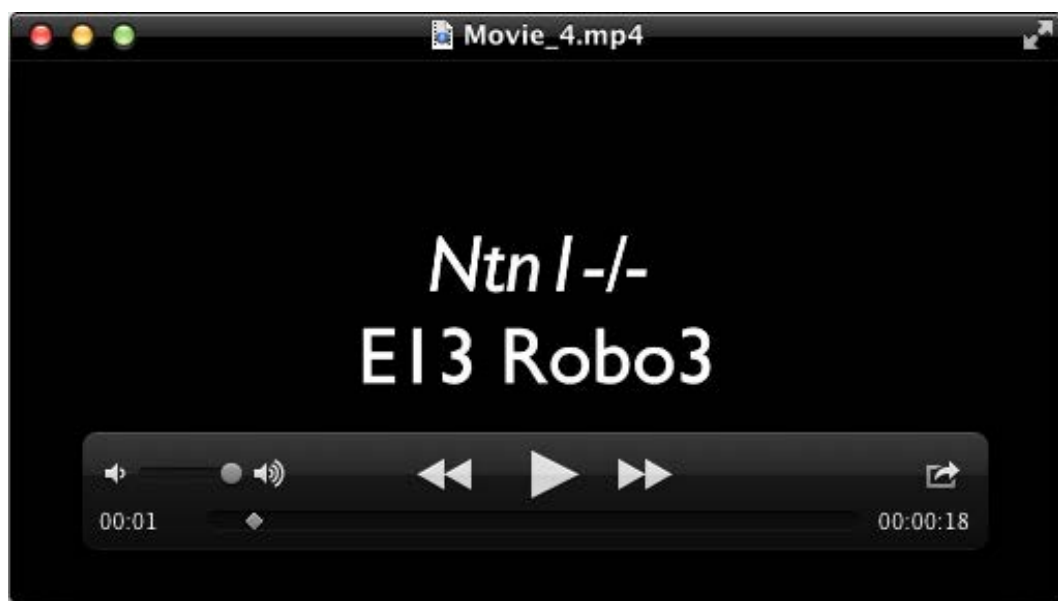

#### Movie 4

3D movie of 3DISCO-cleared hindbrain from an E13 *Ntn1*<sup>-/-</sup> embryo showing the massive invasion of trigeminal and auditory nerves by Robo3-immunoreactive commissural axons. Abbreviations: Ce, cerebellum; Hind, hindbrain; Mes, mesencephalon; Fr; Fasciculus retroflexus; V, trigeminal nerve; VIII, auditory nerve.

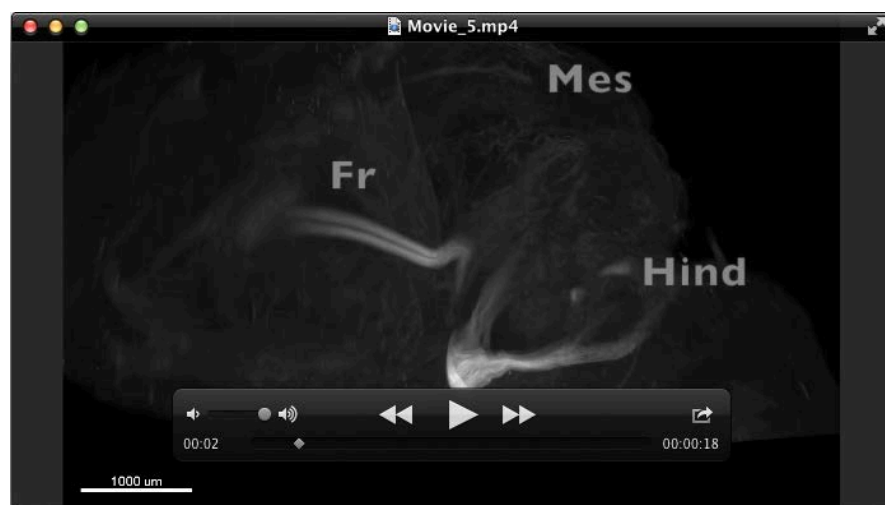

### Movie 5

3D movie of the migrating stream of Robo3-immunoreactive pontine neurons in a wild type E16 embryo. Abbreviations: Hind, hindbrain; Mes, mesencephalon; Fr; Fasciculus retroflexus;



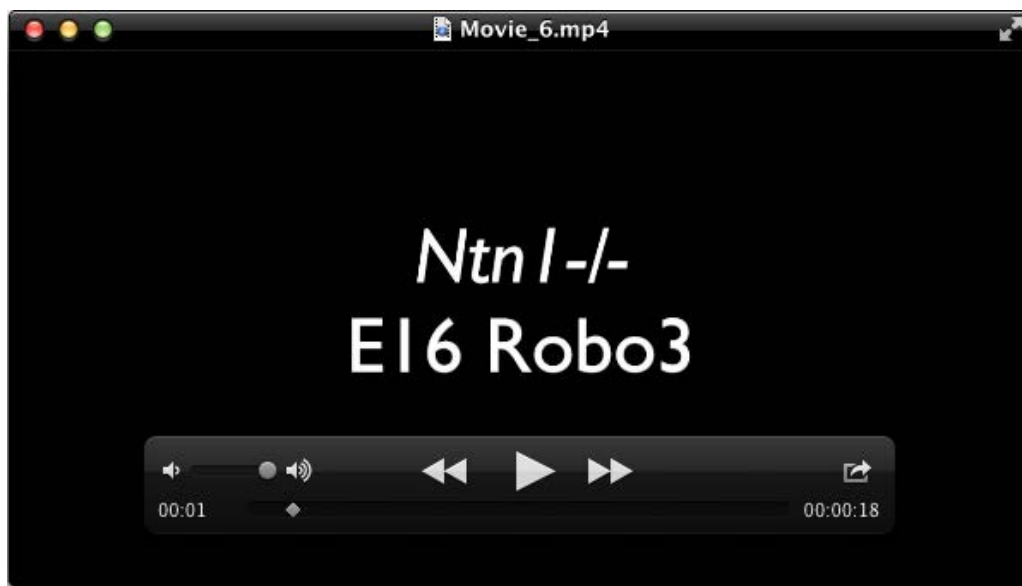

### Movie 6

3D movie of the migrating stream of Robo3-immuoreactive pontine neurons in a *Ntn1*<sup>-/-</sup> E16 embryo. Robo3 pontine neurons fail to reach the midline and a large fraction migrate outside the CNS in to the trigeminal and auditory nerves.

Abbreviations: Hind, hindbrain; Mes, mesencephalon; Fr; Fasciculus retroflexus; V, trigeminal nerve; VIII, auditory nerve.

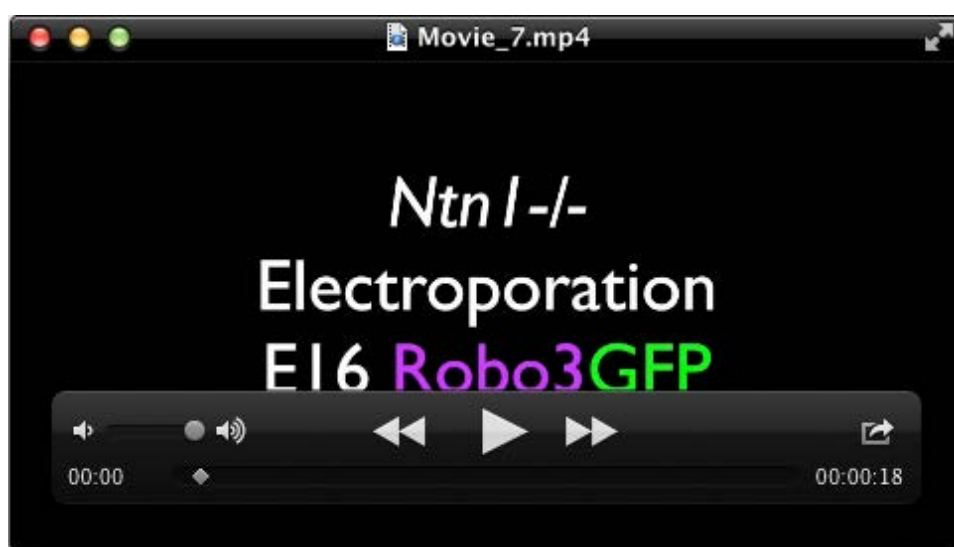

### Movie 7

3D Movies of an E16 *Ntn1*<sup>-/-</sup> embryo electroporated unilaterally with GFP at E13. Whole-mount immunolabeling for Barhl1 (Green) and Robo3 (Magenta) and 3DISCO clearing. GFP+/Barhl1+ pontine neurons invade the PNS. Abbreviations: Hind, hindbrain; Mes, mesencephalon; Fr; Fasciculus retroflexus; V, trigeminal nerve; VIII, auditory nerve.
